# Supplementary material for: Electronic excited states of chromium and vanadium bisarene complexes revisited: interpretation of the absorption spectra on the basis of TD DFT calculations
Source: Royal Society of Chemistry journal article supplement (doi:10.1039/c4dt01481b), 2014-01-01
Supplement: c4dt01481b1.pdf [file c4dt01481b1.pdf]

# Electronic excited states of chromium and vanadium bisarene complexes revisited: Interpretation of the absorption spectra on the basis of TD DFT calculations

Sergey Ketkov,\* Nikolai Isachenkov, Elena Rychagova and Wen-Bih Tzeng

5

## Supporting Information

10

15

20

25

30

35

40

45

50

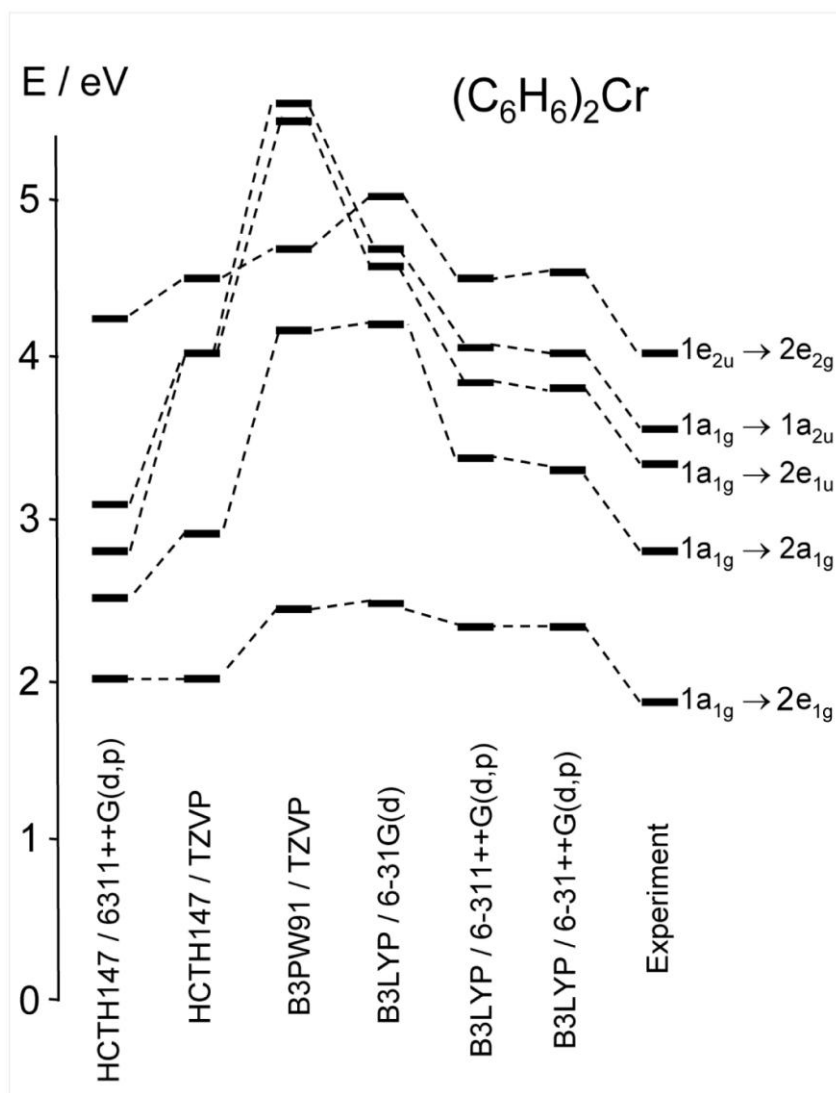

Fig. S1. TD DFT energies of the excited states in the ( $\eta^6$ -C<sub>6</sub>H<sub>6</sub>)<sub>2</sub>Cr molecules calculated at various levels of theory. The MO notation is given in Fig. 1. The experimental values correspond to those in Table 2.
